# Supplementary material for: Blockade of the protease ADAM17 ameliorates experimental pancreatitis
Source: PubMed Central journal article supplement — Proc Natl Acad Sci U S A. 2022 Oct 10;119(42):e2213744119. doi: 10.1073/pnas.2213744119 (PMC9586293; doi:10.1073/pnas.2213744119), 2022-10-10
Supplement: pnas.2213744119.sapp.pdf [file pnas.2213744119.sapp.pdf]

Supporting Information for:

## Blockade of the Protease ADAM17 Ameliorates Experimental Pancreatitis

Mohamed I. Saad, Teresa Weng, Joanne Lundy, Linden J. Gearing, Alison C. West,  
Christopher M. Harpur, Mohammad Alanazi, Christopher Hodges, Daniel Croagh,  
Beena Kumar, Irit Sagi, Stefan Rose-John, Brendan J. Jenkins

**Corresponding author:** Brendan J. Jenkins, **E-mail:** [brendan.jenkins@hudson.org.au](mailto:brendan.jenkins@hudson.org.au).

**This PDF file includes:**

**Supplementary Figure 1:** Reduced expression of ADAM17 in the pancreas of *Adam17<sup>ex/ex</sup>* mice during cerulein-mediated pancreatitis.

**Supplementary Figure 2:** Immunohistochemical analysis of immune cell subsets and acinar cell death in pancreatic tissues following the induction of cerulein-mediated pancreatitis.

**Supplementary Figure 3:** Immunohistochemical analysis of major IL-6 signalling pathways in pancreatic tissues following the induction of cerulein-mediated pancreatitis.

**Supplementary Figure 4:** Expression of distinct cell-type markers and IL-6 trans-signalling components in pancreatic tissues of the cigarette smoke carcinogen (NNK)-induced pancreatitis model.

**Supplementary Figure 5:** Immunohistochemical analysis of major IL-6-trans signalling pathways in pancreatic tissues of the cigarette smoke carcinogen (NNK)-induced pancreatitis model.

**Supplementary Table 1:** Characteristics of patients used in this study.

**Supplementary Table 2:** List of mouse primer sequences used in the study.

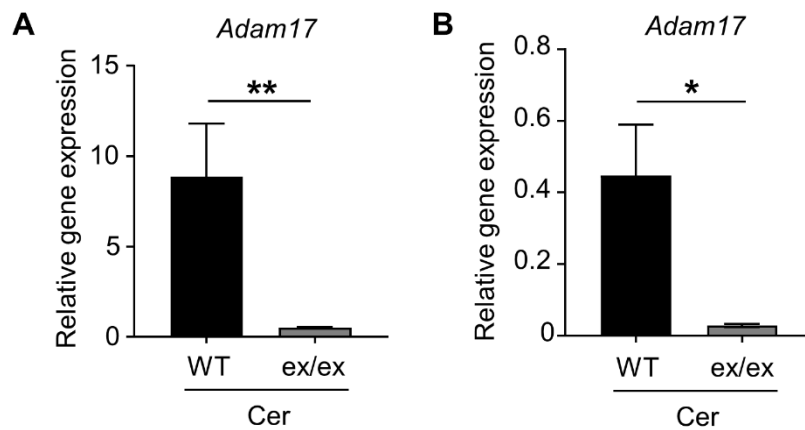

**Supplementary Figure 1: Reduced expression of ADAM17 in the pancreas of *Adam17<sup>ex/ex</sup>* mice during cerulein-mediated pancreatitis.** (A) qPCR expression analysis of *Adam17* gene (normalized against *18S rRNA*) in pancreatic tissues from wild-type (WT) and *Adam17<sup>ex/ex</sup>* (*ex/ex*) mice treated with cerulein (Cer) (n = 5/group). \*\* $P < 0.01$ , Student's *t*-test. (B) qPCR expression analysis of the *Adam17* gene (normalized against *18SrRNA*) in pancreatic acinar cell cultures from WT and *Adam17<sup>ex/ex</sup>* (*ex/ex*) mice treated with cerulein (Cer) (n = 3-5/group). \* $P < 0.05$ , Student's *t*-test.

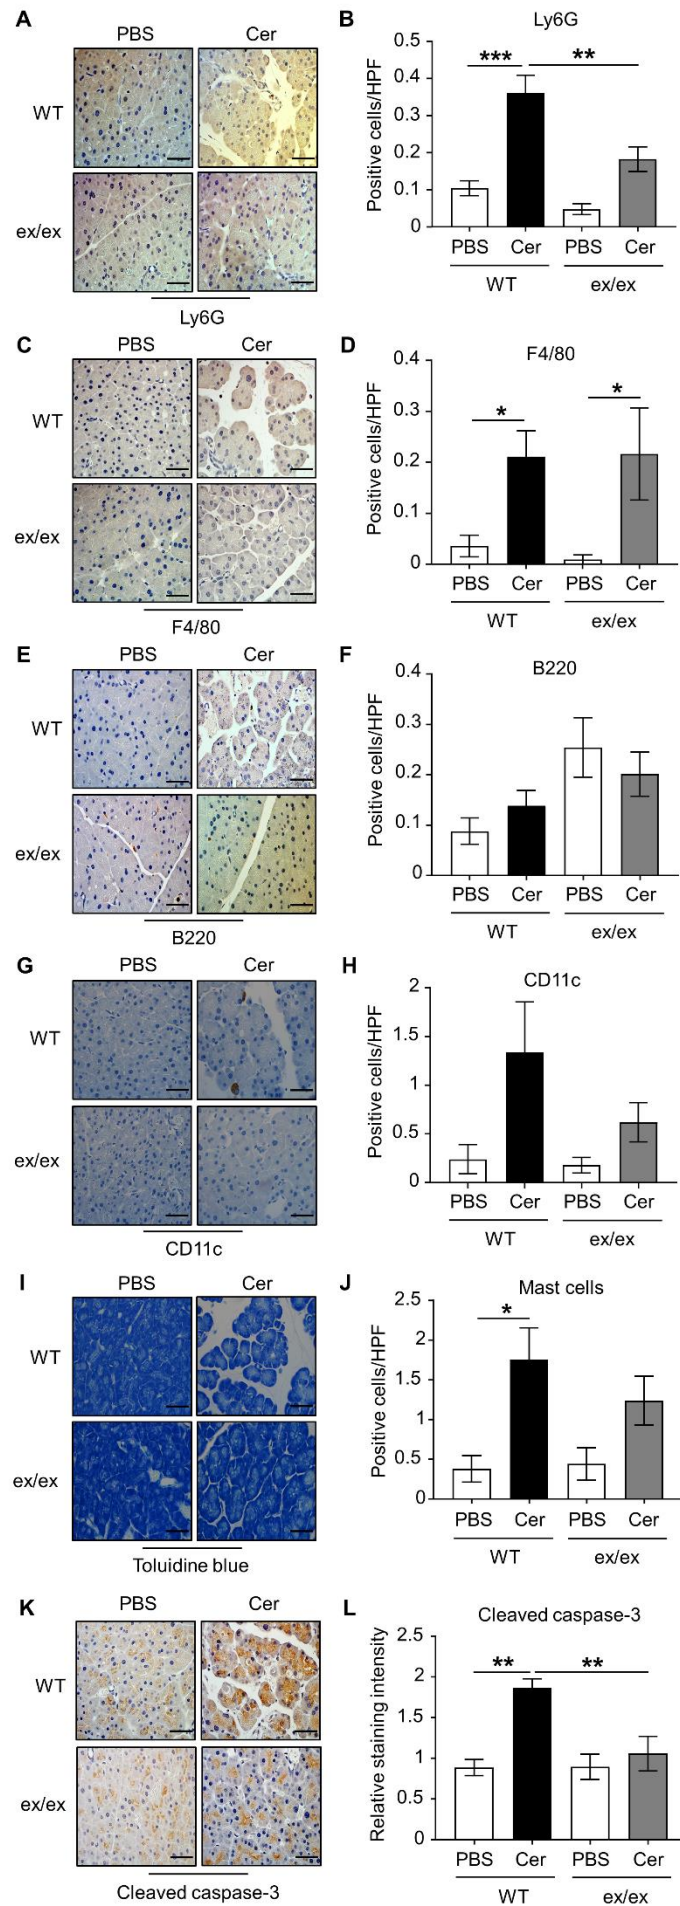

**Supplementary Figure 2: Immunohistochemical analysis of immune cell subsets and acinar cell death in pancreatic tissues following the induction of cerulein-mediated pancreatitis.** (A, C, E, G, I and K) Representative images of Ly6G, F4/80, B220, CD11c, Toluidine blue and cleaved caspase-3-stained pancreatic sections from WT mice and *Adam17<sup>ex/ex</sup>* mice (ex/ex) treated with either PBS (as a control) or cerulein (Cer), respectively. Scale bar, 100 $\mu$ m. (B, D, F, H and J) Quantification of Ly6G, F4/80, B220, CD11c and Toluidine blue-positive cells per high-power field (HPF) in pancreatic tissues of the indicated groups, respectively (n = 5-8/group). (L) Quantification of cleaved caspase-3-staining intensity in pancreatic tissues of the indicated groups (n = 6-8/group). \* $P < 0.05$ , \*\* $P < 0.01$ , \*\*\* $P < 0.001$ , one-way ANOVA.

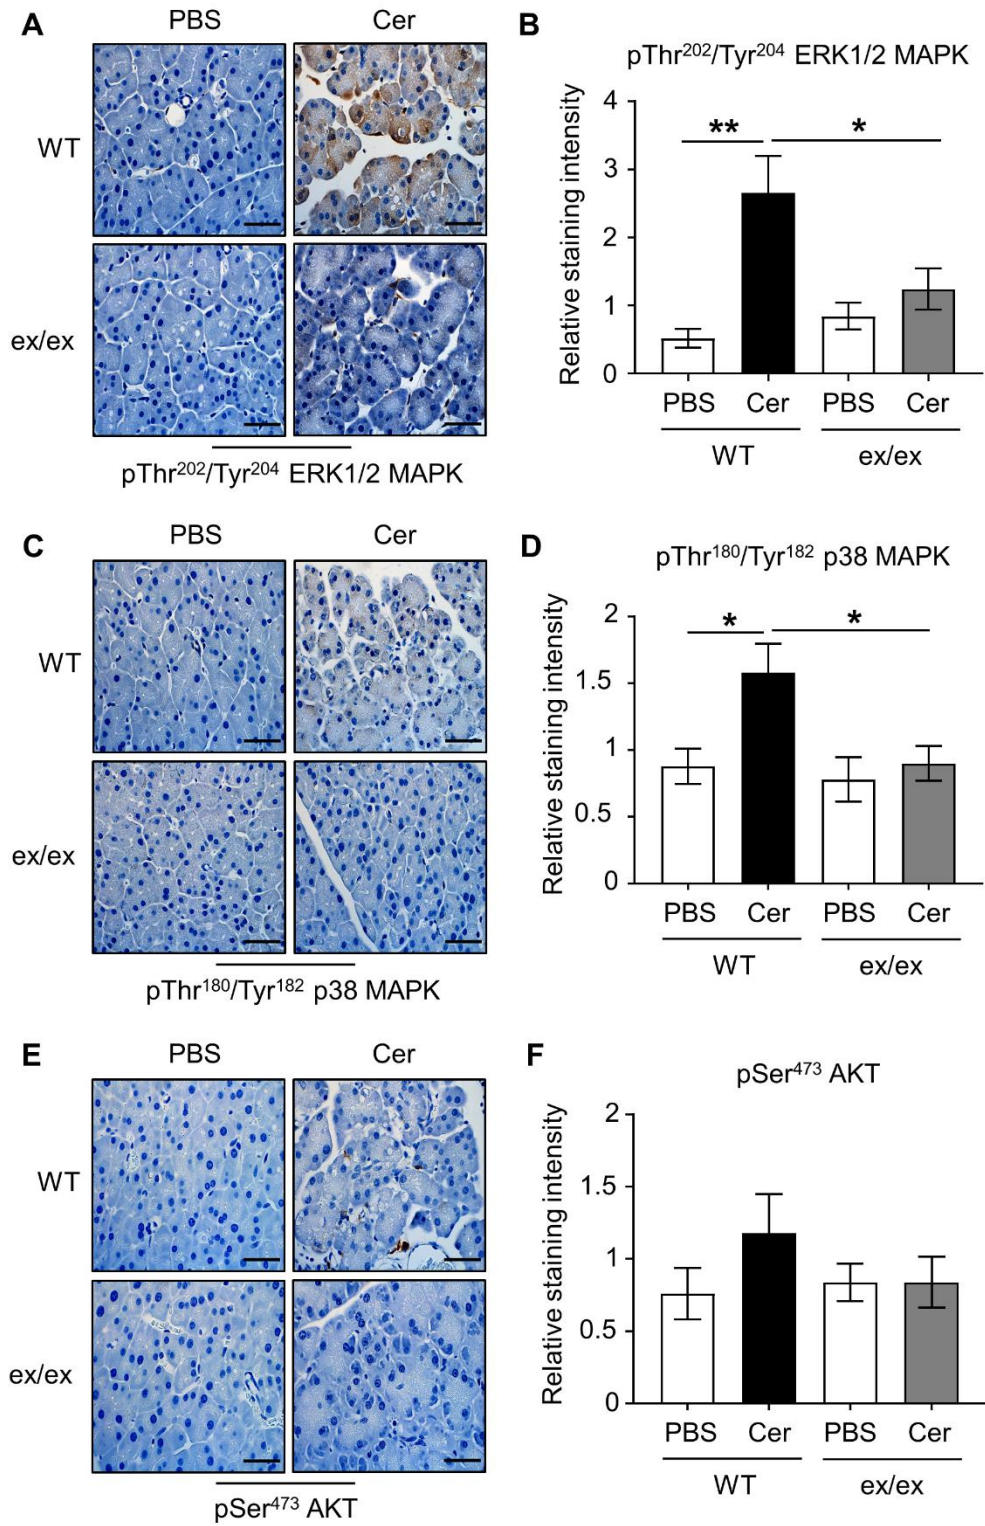

**Supplementary Figure 3: Immunohistochemical analysis of major IL-6 trans-signalling pathways in pancreatic tissues following the induction of cerulein-mediated pancreatitis.** (A, C and E) Representative images of pThr<sup>202</sup>/Tyr<sup>204</sup> ERK1/2 MAPK, pThr<sup>180</sup>/Tyr<sup>182</sup> p38 MAPK and pSer<sup>473</sup> AKT-stained pancreatic sections from WT mice and *Adam17*<sup>ex/ex</sup> mice (ex/ex) treated with either PBS (as a control) or cerulein (Cer), respectively. Scale bar, 100µm. (B, D and F) Quantification of pThr<sup>202</sup>/Tyr<sup>204</sup> ERK1/2 MAPK, pThr<sup>180</sup>/Tyr<sup>182</sup> p38 MAPK and pSer<sup>473</sup> AKT staining intensity in pancreatic tissues of the indicated groups, respectively (n = 5/group). \**P* < 0.05, \*\**P* < 0.01, one-way ANOVA.

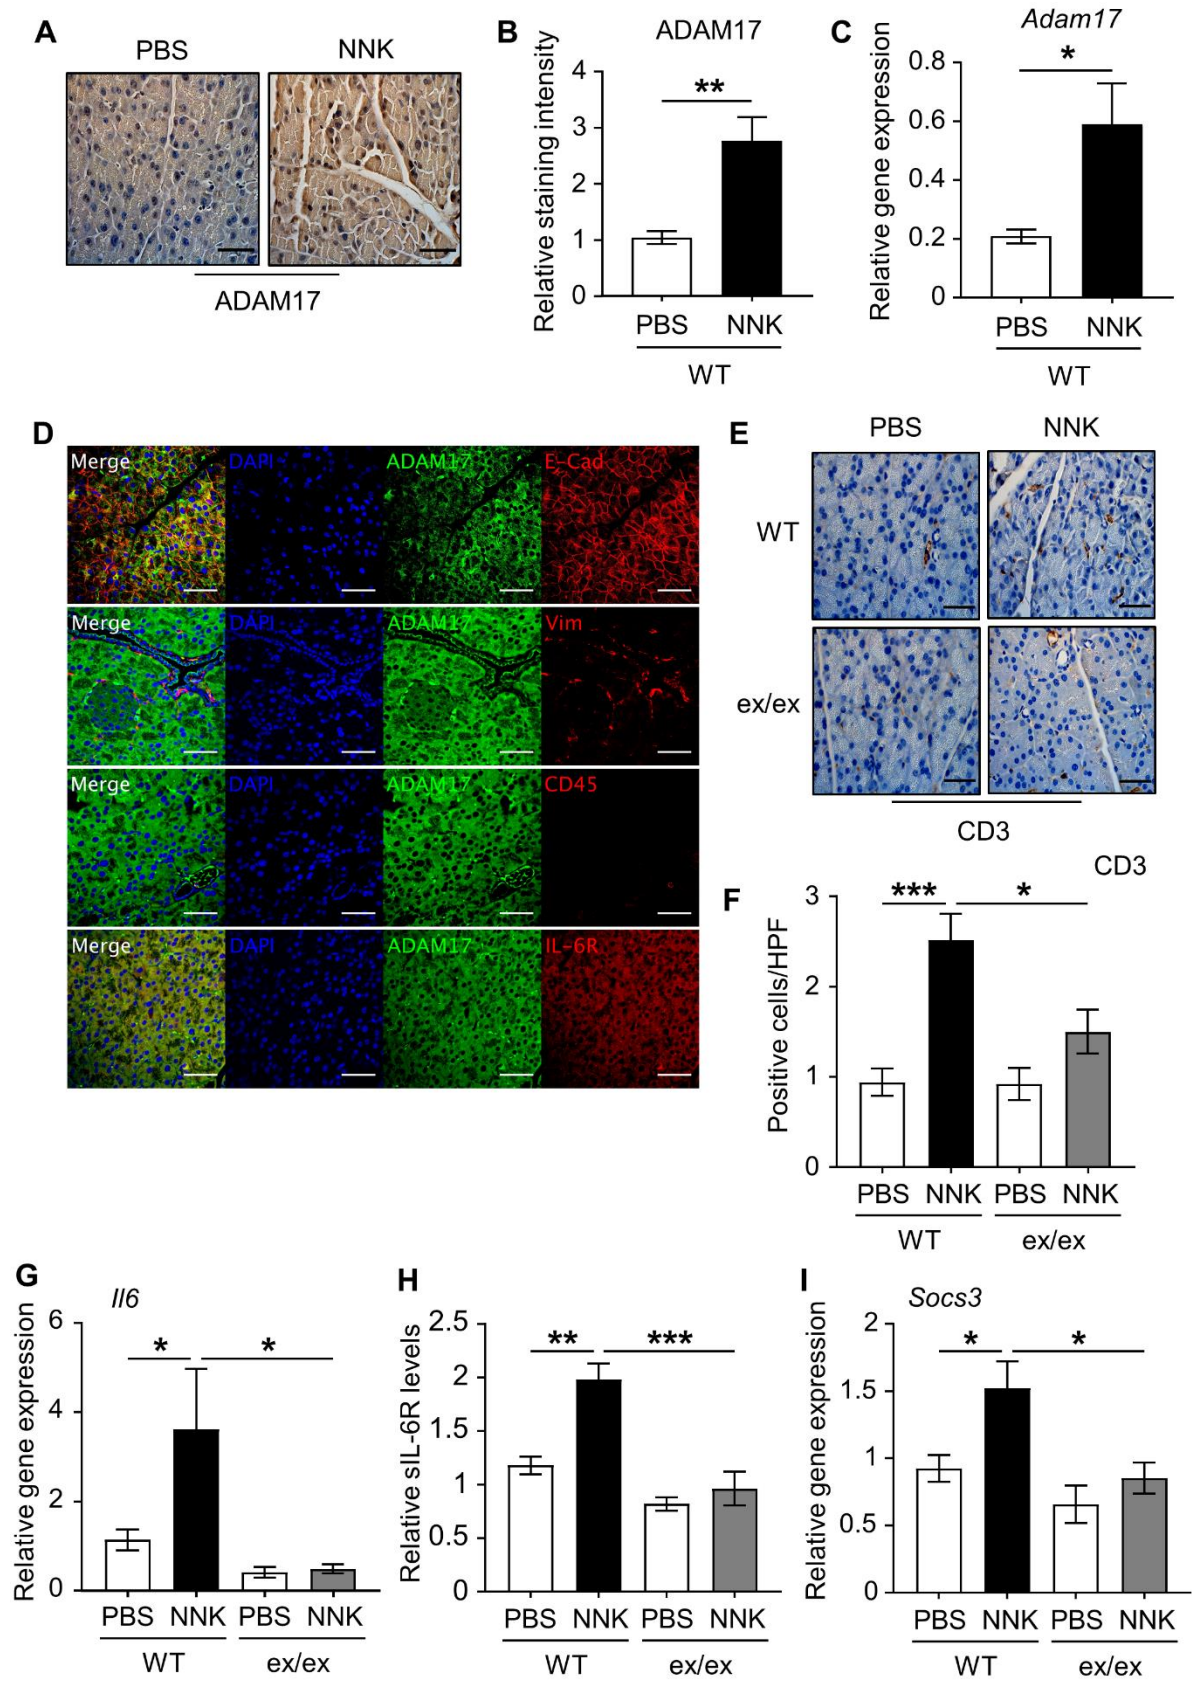



**Supplementary Figure 4: Expression of distinct cell-type markers and IL-6 trans-signalling components in pancreatic tissues of the cigarette smoke carcinogen (NNK)-induced pancreatitis model.** (A) Representative images of ADAM17-stained pancreatic sections from PBS or NNK-treated wild-type (WT) pseudo-A/J mice. Scale bar, 100 $\mu$ m. (B) Quantification of ADAM17 staining intensity in pancreatic tissues of the indicated groups (n = 5/group). \*\* $P < 0.01$ , Student's  $t$ -test. (C) qPCR expression analysis of *Adam17* gene (normalized against *18SrRNA*) in pancreatic acinar cell cultures from WT pseudo-A/J mice treated with either PBS (as a control) or NNK (n = 3-5/group). \* $P < 0.05$ , Student's  $t$ -test. (D) Representative immunofluorescence images of pancreatic sections from NNK-treated pseudo-A/J mice co-stained for ADAM17 and markers for epithelial cells (E-cadherin; E-Cad), endothelial cells (Vimentin; Vim), total immune cells (CD45) and IL-6R. DAPI nuclear staining is blue. Scale bars, 100 $\mu$ m. (E) Representative images of CD3-stained pancreatic sections from WT or *Adam17<sup>ex/ex</sup>* (ex/ex) pseudo-A/J mice treated with either PBS (as a control) or NNK. (F) Quantification of CD3-positive cells per high-power field (HPF) in pancreatic tissues of the indicated groups (n = 5/group). (G) qPCR expression analysis of *Il6* gene (normalized against *18SrRNA*) in pancreatic acinar cell cultures from WT or *Adam17<sup>ex/ex</sup>* (ex/ex) pseudo-A/J mice treated with either PBS (as a control) or NNK (n = 3-5/group). (H) Relative soluble IL-6R levels (sIL-6R) in pancreatic acinar cell culture supernatants from the indicated groups (n = 3-5/group). (I) qPCR expression analysis of *Socs3* gene (normalized against *18SrRNA*) in pancreatic tissues of the indicated groups (n = 5/group). \* $P < 0.05$ , \*\* $P < 0.01$ , \*\*\* $P < 0.001$ , one-way ANOVA.

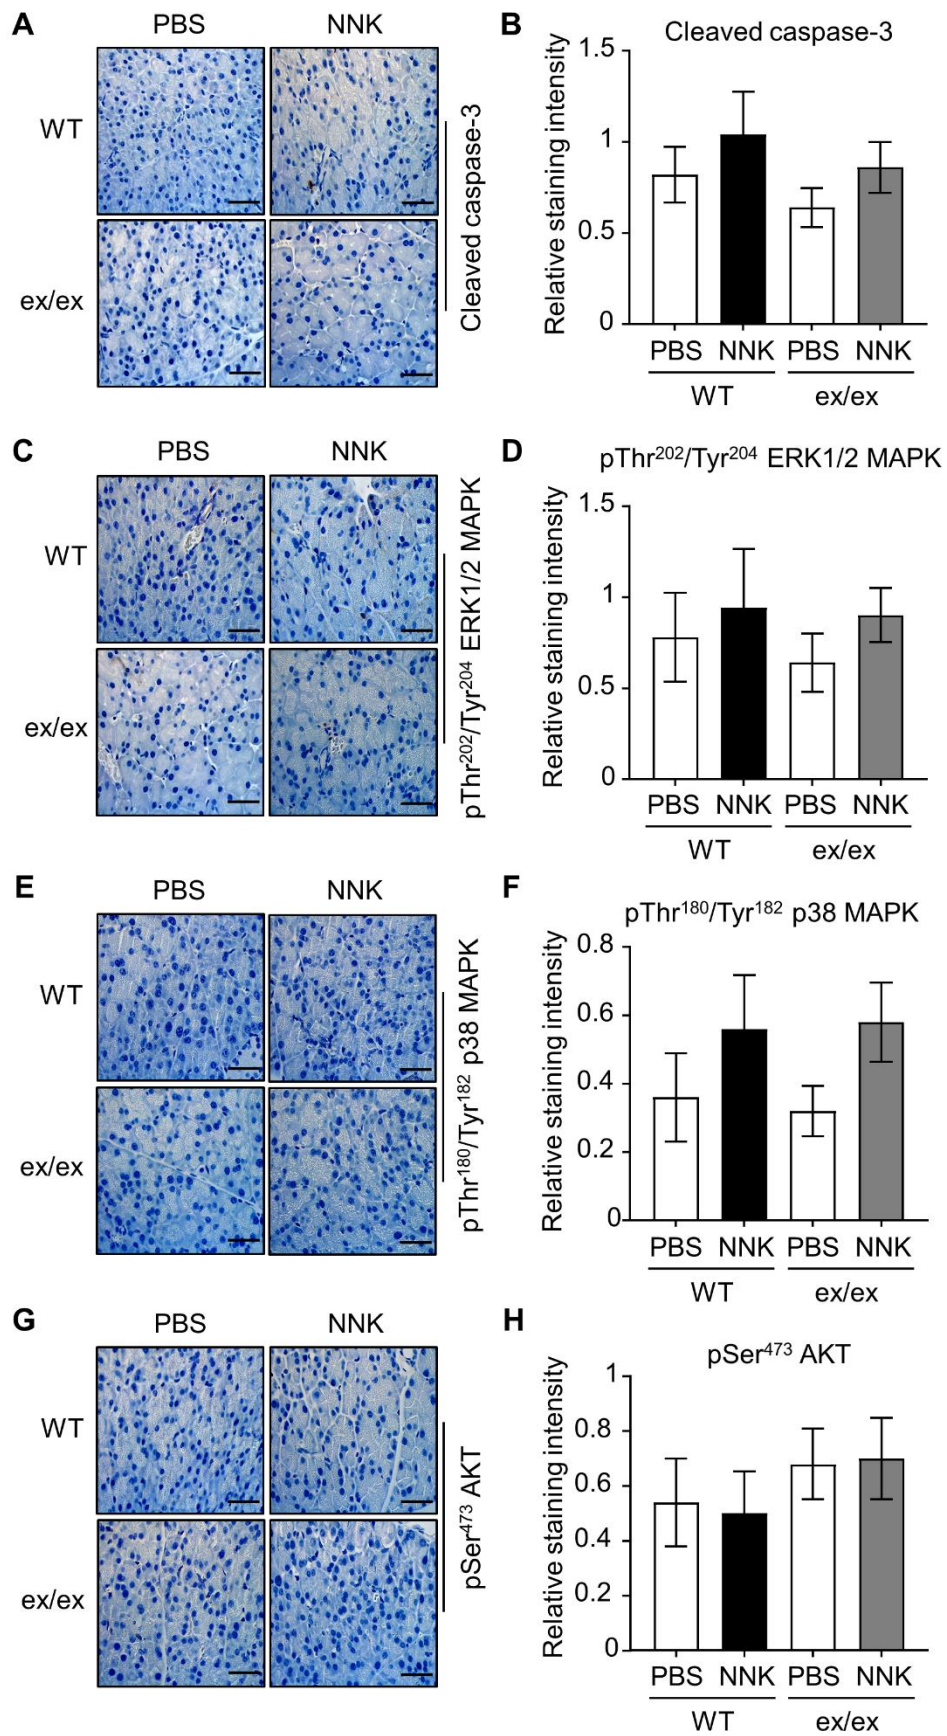

**Supplementary Figure 5: Immunohistochemical analysis of major IL-6-trans signalling pathways in pancreatic tissues of the cigarette smoke carcinogen (NNK)-induced pancreatitis model.** (A, C, E and G) Representative images of cleaved caspase-3, pThr<sup>202</sup>/Tyr<sup>204</sup> ERK1/2 MAPK, pThr<sup>180</sup>/Tyr<sup>182</sup> p38 MAPK and pSer<sup>473</sup> AKT-stained pancreatic sections from PBS (as a control) or NNK-treated wild-type (WT) and *Adam17*<sup>ex/ex</sup> mice (ex/ex), respectively. Scale bar, 100µm. (B, D, F and H) Quantification of cleaved caspase-3, pThr<sup>202</sup>/Tyr<sup>204</sup> ERK1/2 MAPK, pThr<sup>180</sup>/Tyr<sup>182</sup> p38 MAPK and pSer<sup>473</sup> AKT staining intensity in pancreatic tissues of the indicated groups, respectively (n = 5/group).

**Supplementary Table 1:** Characteristics of the patients used in this study.

|                                  | <b>Normal</b> | <b>Pancreatitis</b> |
|----------------------------------|---------------|---------------------|
| <b>Mean age</b><br>Years (range) | 36.8 (23-57)  | 62.3 (45-78)        |
| <b>Sex [number (%)]</b>          |               |                     |
| Male                             | 9 (60)        | 6 (40)              |
| Female                           | 6 (40)        | 9 (60)              |

**Supplementary Table 2:** List of mouse primer sequences used in the study.

| <b>Gene</b>  | <b>Forward</b>         | <b>Reverse</b>        |
|--------------|------------------------|-----------------------|
| <i>Cxcl1</i> | CCTTGACCCTGAAGCTCCCT   | CGGGTGCCATCAGAGCAGTCT |
| <i>Cxcl2</i> | AACATCCAGAGCTTGAGTGTGA | TTCAGGGTCAAGGCAAACCTT |
| <i>Ccl2</i>  | AGGTGTCCCAAAGAAGCTGTA  | ATGTCTGGACCCATTCCTTCT |
| <i>Il6</i>   | ATGGATGCTACCAAACCTGGAT | TGAAGGACTCTGGCTTTGTCT |
| <i>Socs3</i> | GCGGGCACCTTTCTTATCC    | TCCCCGACTGGGTCTTGAC   |
